# Supplementary material for: A Simple Ex Vivo Semiquantitative Fluorescent Imaging Utilizing Planar Laser Scanner: Detection of Reactive Oxygen Species Generation in Mouse Brain and Kidney
Source: PubMed Central journal article supplement — Mol Imaging. 2019 Jan 4;18:1536012118820421. doi: 10.1177/1536012118820421 (PMC6322088; doi:10.1177/1536012118820421), 2019-01-04
Supplement: Supplemental_Figure_1,2,3.pdf [file Supplemental_Figure_1%2C2%2C3.pdf]

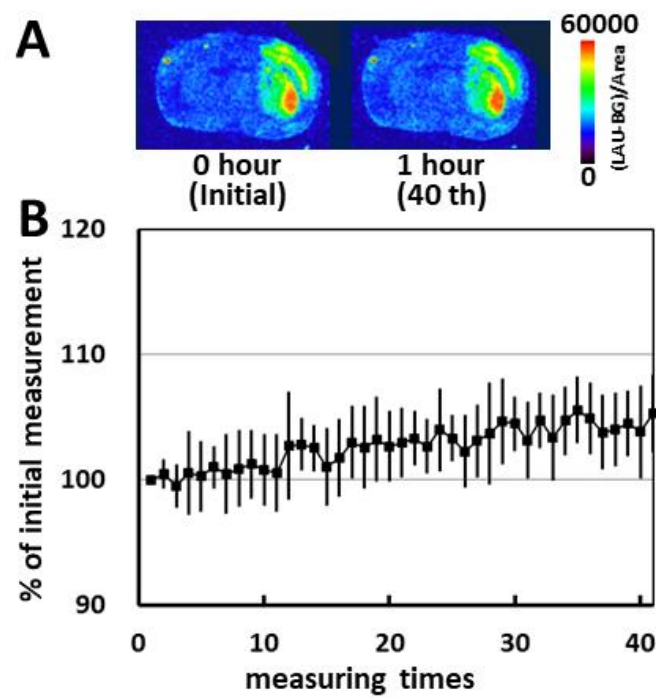

1

2 Supplemental Figure 1.

3 The fluorescence stability upon repeated scanning of the same brain slices utilizing the

1 planar laser scanner. A; The fluorescent images provided by the initial and the 40th  
2 scanning. SNP (20 nmol) was injected into the striatum on the right side of the image, and  
3 saline was simultaneously injected into the contralateral striatum. DHE was administered  
4 through the tail vein 60 minutes after SNP injection. B; The relative value of each  
5 measurement for the initial measurement. The ROIs were identified based on the  
6 fluorescent images. Mean  $\pm$  SD, n = 9.

7

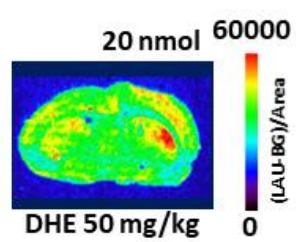

1

2 Supplemental Figure 2.

1 Fluorescence accumulation in the SNP injected mouse brain. SNP (20 nmol) was injected  
2 into the striatum on the right side of the image, and saline was simultaneously injected  
3 into the contralateral striatum. DHE (50 mg/kg) was administered through the tail vein  
4 60 minutes after the SNP injection.

5

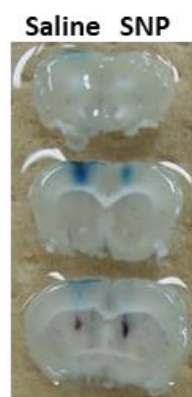

1

2 Supplemental Figure 3.

3 Photographs of brains from mouse injected with Evans blue. SNP was injected into the

1 striatum (the bottom slice) on the right side of the image, and saline was simultaneously  
2 injected into the contralateral striatum. Experiments were carried out with four mice.  
3
